# Supplementary material
Source: Springer Nature journal article supplement (https://www.springermedizin.de/resource/supplementary/12889_2011_4911_MOESM2_ESM.pdf/9491572)
Supplement: MOESM2 [file 9491572]

**Additional file 2**

**Cost-effectiveness results with separate effects for men and women**

**Table 1. Lifetime costs, health gain and cost-effectiveness of cardiovascular disease prevention in Australia.**

|                                                                          | Lifetime health gain (QALYs) | Lifetime intervention costs to Government (\$billion) | Lifetime intervention costs to Patients (\$billion) | Lifetime treatment costs averted (\$billion) | Cost-effectiveness (\$/QALY)    |
|--------------------------------------------------------------------------|------------------------------|-------------------------------------------------------|-----------------------------------------------------|----------------------------------------------|---------------------------------|
| Current practice                                                         | 260,000 (200,000 to 310,000) | \$12 (\$12 to \$12)                                   | \$2.6 (\$2.6 to \$2.6)                              | -\$3.2 (-\$4.4 to -\$2.2)                    | \$42,000 (\$33,000 to \$59,000) |
| Existing single risk factor-based guidelines                             | 170,000 (100,000 to 250,000) | \$7.4 (\$5.2 to \$9.9)                                | \$3.5 (\$2.5 to \$4.6)                              | -\$2.2 (-\$3.4 to -\$1.2)                    | \$50,000 (\$38,000 to \$75,000) |
| Absolute risk (≥15%)                                                     | 65,000 (44,000 to 90,000)    | \$1.3 (\$0.9 to \$1.8)                                | \$0.7 (\$0.5 to \$1.0)                              | -\$0.6 (-\$1.0 to -\$0.4)                    | \$22,000 (\$18,000 to \$28,000) |
| Absolute risk (≥10%)                                                     | 140,000 (96,000 to 200,000)  | \$3.5 (\$2.5 to \$4.6)                                | \$1.9 (\$1.4 to \$2.5)                              | -\$1.5 (-\$2.2 to -\$0.9)                    | \$27,000 (\$22,000 to \$35,000) |
| Absolute risk (≥5%)                                                      |                              |                                                       |                                                     |                                              |                                 |
| – including statins <10%                                                 | 320,000 (220,000 to 440,000) | \$10.0 (\$7.2 to \$14.0)                              | \$5.5 (\$3.9 to \$7.3)                              | -\$3.6 (-\$5.4 to -\$2.1)                    | \$38,000 (\$32,000 to \$48,000) |
| – excluding statins <10%                                                 | 280,000 (190,000 to 390,000) | \$6.5 (\$4.5 to \$8.6)                                | \$4.3 (\$3.0 to \$5.6)                              | -\$3.1 (-\$4.7 to -\$1.9)                    | \$27,000 (\$21,000 to \$34,000) |
| Absolute risk (≥5%) assuming the cheaper price of statins in New Zealand |                              |                                                       |                                                     |                                              |                                 |
| – including statins <10%                                                 | 320,000 (220,000 to 440,000) | \$5.1 (\$3.6 to \$6.8)                                | \$3.7 (\$2.6 to \$4.9)                              | -\$3.6 (-\$5.4 to -\$2.1)                    | \$16,000 (\$12,000 to \$22,000) |
| – excluding statins <10%                                                 | 280,000 (190,000 to 390,000) | \$4.7 (\$3.3 to \$6.2)                                | \$3.6 (\$2.6 to \$4.8)                              | -\$3.1 (-\$4.7 to -\$1.9)                    | \$19,000 (\$14,000 to \$25,000) |

NB. All values are rounded to two significant figures. Health gains and costs are presented as mean and 95% uncertainty interval, and cost-effectiveness ratio as median and 95% uncertainty interval. Costs are presented in 2008 Australian dollars. QALY – quality-adjusted life year

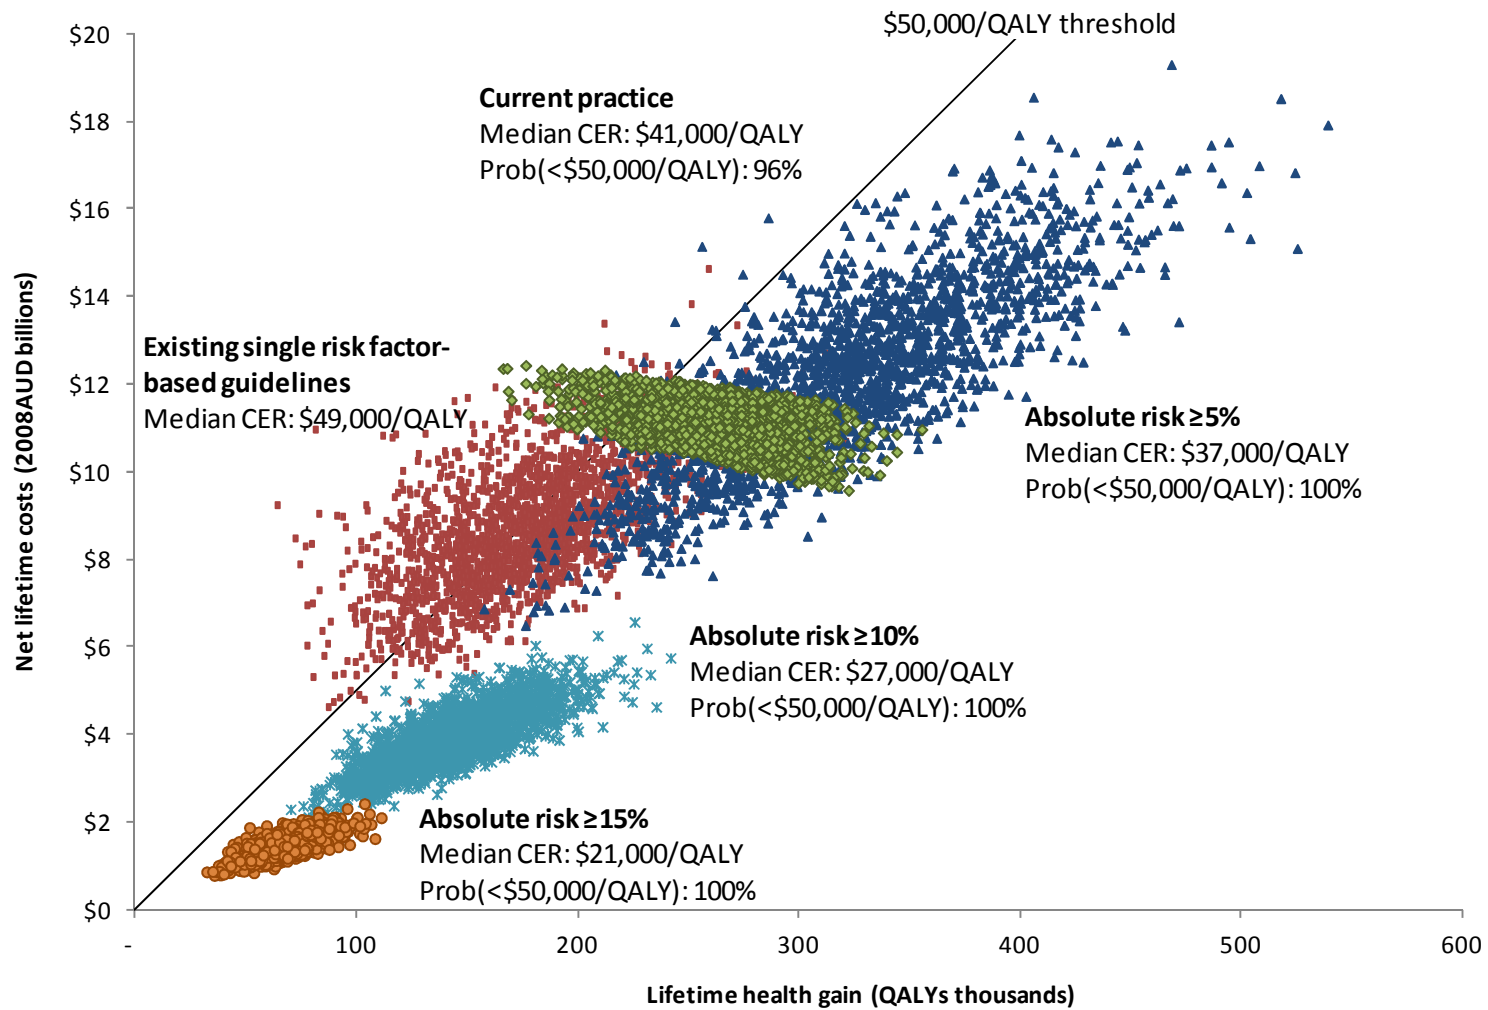

Figure 1 Cost-effectiveness of cardiovascular disease prevention
